# Supplementary material for: Dynamic enhancer partitioning instructs activation of a growth-related gene during exit from naïve pluripotency
Source: eLife. 2019 Apr 16;8:e44057. doi: 10.7554/eLife.44057 (PMC6488298; doi:10.7554/eLife.44057)
Supplement: Figure 1—source data 1. [file elife-44057-fig1-data1.xlsx]

## Sheet: Sheet1
Figure 1B: H3K27ac ChIP-qPCR shows enrichment for this mark at E1 to E3 in ESCs and EpiLCs, while E4 only becomes enriched in EpiLCs.
E1	Rep 1	Rep 2	Rep 3
ESCs	1.2223	0.865743	1.5821
EpiLCs	0.821609	0.951519	1.51036
E2	Rep 1	Rep 2	Rep 3
ESCs	1.05031	0.659176	1.01072
EpiLCs	1.45355	1.31959	2.23055
E3	Rep 1	Rep 2	Rep 3
ESCs	1.50901	0.889473	1.29052
EpiLCs	2.53906	2.48741	2.98619
E4	Rep 1	Rep 2	Rep 3
ESCs	0.257001	0.160987	0.155208
EpiLCs	1.1949	1.30194	1.4792
Figure 1—figure supplement 2A: H3K27ac ChIP-qPCR at control loci.
E Jarid2	Rep 1	Rep 2	Rep 3
ESCs	0.727513	0.821631	0.755844
EpiLCs	1.40028	1.27015	1.94782
E Fgf5	Rep 1	Rep 2	Rep 3
ESCs	0.0339108	0.0346298	0.074608
EpiLCs	1.6281	0.957043	1.75661
pPax5	Rep 1	Rep 2	Rep 3
ESCs	0.031435	0.0354464	0.0323609
EpiLCs	0.0432713	0.0389473	0.0746783
