# Supplementary material for: Dynamic enhancer partitioning instructs activation of a growth-related gene during exit from naïve pluripotency
Source: eLife. 2019 Apr 16;8:e44057. doi: 10.7554/eLife.44057 (PMC6488298; doi:10.7554/eLife.44057)
Supplement: Figure 2—source data 1. [file elife-44057-fig2-data1.xlsx]

## Sheet: Sheet1
Figure 2C: RT-qPCR of Liz (left) and Zdbf2 (right) during EpiLC differentiation in WT and the ∆E1-3 mutant.
	WT						∆E1-3
Liz	Rep 1	Rep 2	Rep 3	Rep 4	Rep 5		Rep 1	Rep 2	Rep 3
D0	0.0170484	0.0105945	0.020687	0.0142239	0.0208362		0.00250678	0.00267843	0.00734028
D2	0.0169948	0.0187828	0.0566717	0.040903	0.0213354		0.00259106	0.00186647	0.00646739
D4	0.0032986	0.00180111	0.00973062	0.0295077	0.0423532		0.000525355	0.000151516	6.63772e-05
D7	0.000359312	0.000689505	0.000529199	0.00435243	0.00597055		0.000344921	0.00316931	9.52928e-06
Zdbf2	Rep 1	Rep 2	Rep 3	Rep 4	Rep 5		Rep 1	Rep 2	Rep 3
D0	0.000303257	0.000196524	0.00187642	0.000974985	0.000566764		0.00062229	0.00069566	0.00101223
D2	0.010241	0.00861645	0.0105142	0.0152402	0.0147158		0.00396714	0.00525199	0.00361047
D4	0.0219045	0.0216186	0.0621483	0.0194709	0.0346508		0.00413973	0.00440786	0.00643696
D7	0.0124962	0.0300228	0.0733894	0.0308651	0.0638861		0.00483186	0.00641491	0.0167432
Figure 2D: DNA methylation of pLiz (left) and the sDMR (right) during EpiLC differentiation as measured by bisulfite conversion followed by pyrosequencing (BS-pyro) in WT and the ∆E1-3 mutant.
	WT						∆E1-3
pLiz	Rep 1	Rep 2	Rep 3	Rep 4	Rep 5		Rep 1	Rep 2	Rep 3	Rep 4	Rep 5
D0	4.244		3	7.158	7.637		20.822	20.555	3.384
D2	6.299	5.734	4	7.747	4.363		19.787	19.601	5.608
D4	44.582	49.474	42.7	32.324	41.744		76.016	73.937	64.948
D7	82.411	83.167	70.9	65.956	79.76		85.742	87.904	86.342
sDMR	Rep 1	Rep 2	Rep 3	Rep 4	Rep 5		Rep 1	Rep 2	Rep 3	Rep 4	Rep 5
D0	15.79	15.0129	11.86	22.9114	22.9486		22.8214	21.8086	11.1129
D2	75.3786	77.23	68.17	68.7229	58.8871		58.3043	54.4571	41.8057
D4	62.4414	84.0543	80.92	77.9329	80.86		59.8214	60.2857	70.6643
D7	85.3771	87.3414	84.66	76.7857	84.79		63.22	65.4071	73.6214
Figure 2F: RT-qPCR of Liz (left) and Zdbf2 (right) during EpiLC differentiation in WT and the ∆E4 mutant.
	WT							∆E4
Liz	Rep 1	Rep 2	Rep 3	Rep 4	Rep 5	Rep 6		Rep 1	Rep 2	Rep 3	Rep 4
D0	0.00554	0.00498	0.01702	0.03164				0.01134	0.01	0.01286	0.02744
D2	0.02547	0.02588						0.01732	0.0279
D4	0.00495	0.007	0.00324	0.00123				0.00631	0.00673	0.01142	0.01441
D7	0.00018	0.00028	8e-05	0.00054				0.00022	0.00015	0.00095
Zdbf2	Rep 1	Rep 2	Rep 3	Rep 4	Rep 5	Rep 6		Rep 1	Rep 2	Rep 3	Rep 4
D0	0.0015692	0.000395558	0.00153302	0.00072245	0.00030326	0.00019652		0.000189904	0.000381278	0.00012372	0.00023223
D2	0.00281791	0.00113019	0.00294525	0.00202095	0.010241	0.00861645		0.00572701	0.00577088	0.00379455	0.00482655
D4	0.00772419	0.00507268	0.0057626	0.0088122	0.0219045	0.0216186		0.00223708	0.00411607	0.00707262	0.00586989
D7	0.025917	0.0200335	0.015516	0.0164556	0.0124962	0.0300228		0.00233811	0.00537618	0.00472771	0.00340979
Figure 2G: DNA methylation of pLiz (left) and the sDMR (right) during EpiLC differentiation as measured by BS-pyro in WT and the ∆E4 mutant.
	WT						∆E4
pLiz	Rep 1	Rep 2	Rep 3	Rep 4	Rep 5		Rep 1	Rep 2	Rep 3	Rep 4	Rep 5
D0	4.244		3	7.158			3.747	4.343	8.214	3.251	7.11
D2	6.299	5.734	4	7.747			15.182	15.386	8.076	3.765	10.16
D4	44.582	49.474	42.7	32.324			78.998	79.891	29.933	48.37	50.267
D7	82.411	83.167	70.9	65.956			83.885	83.264	66.967	72.23	74.029
sDMR	Rep 1	Rep 2	Rep 3	Rep 4	Rep 5		Rep 1	Rep 2	Rep 3	Rep 4	Rep 5
D0	15.79	15.0129	11.86	22.9114			20.8143	21.0271	31.5157	16.2057
D2	75.3786	77.23	68.17	68.7229			77.4414	74.6557	71.3157	59.2114	74.7157
D4	62.4414	84.0543	80.92	77.9329			82.2757	78.2529	77.0386	82.8957	74.1029
D7	85.3771	87.3414	84.66	76.7857			83.3614	79.7529	81.1271	84.5729	78.02
Figure 2H: H3K27me3 ChIP-qPCR in ESCs (left) and EpiLCs (right).
	WT ESCs				WT EpiLCs				∆E4 ESCs				∆E4 EpiLCs
	Rep 1	Rep 2	Rep 3		Rep 1	Rep 2	Rep 3		Rep 1	Rep 2	Rep 3		Rep 1	Rep 2	Rep 3
pLiz	0.0320558	0.0324294	0.063		0.0569238	0.102818	0.132		0.0309079	0.0604923	0.068		0.0459596	0.0459729	0.055
-5kb E4	0.0552164	0.123242	0.203		0.0445622	0.019138	0.116		0.101224	0.175193	0.126		0.0511076	0.0552194	0.061
-1kb E4	0.131789	0.213267	0.301		0.0183389	0.0317779	0.078		0.507044	0.634601	0.471		0.0679389	0.0867624	0.09
E4	0.0562823	0.0965329	0.179		0.0349894	0.0355101	0.091		-	-	-		-	-	-
sDMR_A	0.601466	1.10666	1.423		0.0566728	0.0370166	0.139		1.4446	1.61971	1.241		0.113199	0.130359	0.173
sDMR_B	0.750177	1.3701	2.088		0.0959093	0.0718149	0.191		1.87056	1.95656	1.519		0.236426	0.336806	0.332
sDMR_C	0.829035	1.60065	2.046		0.0663704	0.0378692	0.165		2.00836	2.72706	1.957		0.174266	0.181135	0.206
pZdbf2	0.246904	0.466384	0.515		0.0161274	0.0191202	0.074		0.644217	0.821799	0.676		0.0624317	0.126043	0.086
Pax5	1.30378	2.33114	2.757		2.66994	2.46366	6.154		3.11687	3.226	2.908		3.54921	5.97119	5.951
Oct4	0.0197921	0.0271021	0.064		0.0827706	0.0621838	0.131		0.0368207	0.0442274	0.022		0.061135	0.0952273	0.094
Figure 2—figure supplement 1B: RT-qPCR of Liz (left) and Zdbf2 (right) during EpiLC differentiation in WT and the ∆E3 mutant.
	WT						∆E3
Liz	Rep 1	Rep 2	Rep 3	Rep 4	Rep 5		Rep 1	Rep 2	Rep 3	Rep 4
D0	0.0170484	0.020687	0.0208362				0.0271792	0.0251573
D2	0.0169948	0.0187828	0.0566717	0.025467	0.0213354		0.0333179	0.0287684
D4	0.0032986	0.00180111	0.00973061	0.00494523			0.00252585	0.00281389
D7	0.000359312	0.000689505	0.000529199	0.000180329	0.00597055		0.00013096	0.00010159
Zdbf2	Rep 1	Rep 2	Rep 3	Rep 4	Rep 5		Rep 1	Rep 2	Rep 3	Rep 4
D0	0.000423302	0.00072245	0.000566764				0.00041375	0.00174009	0.00078281	0.00102484
D2	0.001456	0.00202095	0.0147158				0.00136705	0.00087827	0.0146374	0.0115901
D4	0.00400208	0.0088122	0.0346508				0.00371654	0.00504175	0.0246856	0.0163909
D7	0.0136326	0.0164556	0.0638861				0.00990218	0.0112168	0.0500534	0.0445695
Figure 2—figure supplement 1C: DNA methylation of pLiz (left) and the sDMR (right) during EpiLC differentiation as measured by BS-pyro in WT and the ∆E3 mutant.
	WT					∆E3
pLiz	Rep 1	Rep 2	Rep 3	Rep 4		Rep 1	Rep 2	Rep 3	Rep 4
D0	5.3	6	4.244	7.637		4.3	19.548	0.917	2.131
D2	4.5	4.9	6.299	4.363		4.7	10.271	6.173	5.486
D4	10.1	8.3	44.582	41.744		6.7	20.405	41.179	41.179
D7	61.4	64.3	82.411	79.76		61.5	79.364	67.973	75.84
sDMR	Rep 1	Rep 2	Rep 3	Rep 4		Rep 1	Rep 2	Rep 3	Rep 4
D0	17	22.71	15.0129	22.9486		10.2857	23.3571	25.7214	24.8071
D2	38.71	39	77.23	58.8871		34.1667	34.3157	68.9214	66.4743
D4	63.43	63.43	84.0543	80.86		61.2857	77.1217	80.7843	79.2414
D7	68.14	74.29	87.3414	84.79		74.4286	79.9257	74.2057	84.3171
Figure 2—figure supplement 1D: H3K27me2 ChIP-qPCR at E4 in WT ESCs and EpiLCs.
	WT ESCs				WT EpiLCs
	Rep 1	Rep 2	Rep 3		Rep 1	Rep 2	Rep 3
E4	0.103046	0.100309	0.0885743		0.0653407	0.037575	0.0189982
Ctsh	0.583	0.832	0.822462		0.684	0.331	0.138775
Oct4	0.0519472	0.0227565	0.040172		0.0431585	0.0388315	0.0212809
