# Supplementary material for: Dynamic enhancer partitioning instructs activation of a growth-related gene during exit from naïve pluripotency
Source: eLife. 2019 Apr 16;8:e44057. doi: 10.7554/eLife.44057 (PMC6488298; doi:10.7554/eLife.44057)
Supplement: Figure 3—source data 1. [file elife-44057-fig3-data1.xlsx]

## Sheet: Sheet1
Figure 3A: H3K27ac ChIP-qPCR in WT and Eed-/- ESCs.
	WT			Eed-/-
	Rep 1	Rep 2		Rep 1	Rep 2
pLiz	2.05624	2.90957		1.69442	1.53424
E1	1.99833	1.65891		2.02348	1.77005
E2	2.22927	2.25939		1.81017	1.52863
E3	1.82223	2.46405		3.58081	3.14565
E4	0.32987	0.323825		1.18396	0.937451
pZdbf2	0.0812829	0.226949		1.56878	1.52291
Jarid2	1.65475	3.04005		2.07761	1.4863
Fgf5	0.36709	0.408445		0.982617	0.658914
Figure 3B: H3K27ac ChIP-qPCR in WT and ∆Liz EpiLCs.
	WT EpiLCs				∆Liz EpiLCs
	Rep 1	Rep 2	Rep 3		Rep 1	Rep 2	Rep 3
E4	1.1949	1.30194	1.4792		0.678925	0.828792	0.664152
E Jarid2	1.40028	1.27015	1.94782		1.43105	1.55582	1.4309
E Fgf5	1.6281	0.957043	1.75661		1.09454	1.39225	1.26934
