# Supplementary material for: Dynamic enhancer partitioning instructs activation of a growth-related gene during exit from naïve pluripotency
Source: eLife. 2019 Apr 16;8:e44057. doi: 10.7554/eLife.44057 (PMC6488298; doi:10.7554/eLife.44057)
Supplement: Figure 4—source data 1. [file elife-44057-fig4-data1.xlsx]

## Sheet: Sheet1
Figure 4B: CTCF ChIP-qPCR in WT ESCs and EpiLCs and Eed-/- ESCs.
	WT ESCs				WT EpiLCs				Eed-/- ESCs
	Rep 1	Rep 2	Rep 3		Rep 1	Rep 2	Rep 3		Rep 1	Rep 2	Rep 3
CTCF Left_1	5.31052	3.37391	1.90481		3.95339	2.40204	2.48592		5.165	3.258
CTCF Left_2	3.86595	2.48204	1.24948		2.63917	1.51668	1.76276		4.027	3.312
CTCF_PS	1.59995	0.764436	0.950882		0.0889933	0.117541	0.355017		2.23	1.25
Figure 4D: CTCF ChIP-qPCR in WT, Dnmt tKO and ∆Liz ESCs and EpiLCs.
	WT ESCs				WT EpiLCs				Dnmt tKO ESCs				Dnmt tKO EpiLCs				∆Liz ESCs				∆Liz EpiLCs
	Rep 1	Rep 2	Rep 3		Rep 1	Rep 2	Rep 3		Rep 1	Rep 2	Rep 3		Rep 1	Rep 2	Rep 3		Rep 1	Rep 2	Rep 3		Rep 1	Rep 2	Rep 3
CTCF_PS	1.59995	0.764436	0.950882		0.0889933	0.117541	0.355017		1.70577	1.32414	0.932552		0.100054	0.776158	0.517603		1.11457	0.860343			0.0938721	0.328493	0.23064
Figure 4E: RT-qPCR of Liz (left) and Zdbf2 (right) during EpiLC differentiation in WT and the ∆CTCF_PS mutant.
	WT					∆CTCF_PS
Liz	Rep 1	Rep 2	Rep 3	Rep 4		Rep 1	Rep 2	Rep 3	Rep 4
D0	0.0339173	0.0345012	0.0392201			0.0221015	0.0216956	0.0262419
D2	0.0549755	0.0469185	0.02847	0.045384		0.0524057	0.0465694	0.0513353	0.0407804
D4	0.0200165	0.0213116	0.0114541	0.0132066		0.0151126	0.0162752	0.0107111	0.0120931
D7	0.00445433	0.00323706	0.00252969	0.00237965		0.00146586	0.00201564	0.000968825	0.00130234
Zdbf2	Rep 1	Rep 2	Rep 3	Rep 4		Rep 1	Rep 2	Rep 3	Rep 4
D0	0.00181184	0.00170173	0.00197062			0.00165544	0.00125474	0.00164588
D2	0.0118359	0.0129716	0.0029634	0.00708178		0.015549	0.019464	0.01431	0.00568494
D4	0.0296013	0.0296336	0.0186001	0.0201843		0.0212729	0.0377725	0.00946549
D7	0.0534133	0.071785	0.066083	0.0601836		0.0674287	0.015869	0.0134544	0.0276196
Figure 4F: DNA methylation of pLiz (left) and the sDMR (right) during EpiLC differentiation as measured by BS-pyro in WT and the ∆ mutant.
	WT					∆CTCF_PS
pLiz	Rep 1	Rep 2	Rep 3	Rep 4		Rep 1	Rep 2	Rep 3	Rep 4
D0	13.347	17.799	12.305			15.736	15.417	14.102
D2	13.177	13.887	18.983	21.638		17.375	15.717	21.369	23.152
D4	30.566	32.17	39.168			31.674	35.156	46.78	44.421
D7	47.051	48.682	62.904			47.377	57.907	57.216	66.192
sDMR	Rep 1	Rep 2	Rep 3	Rep 4		Rep 1	Rep 2	Rep 3	Rep 4
D0	12.9117	13.67	12.7567			12.7767	12.8067	12.585
D2	63.045	65.1867	69.7386	69.0943		48.15	49.705	55.2871	53.95
D4	70.645	69.1283	78.2229			63.96	65.705	72.38	72.7886
D7	70.96	72.4433	77.57			64.3717	65.2917	66.6086	70.0829
Figure 4G: RT-qPCR of Zdbf2 in ESCs in absence of CTCF partition and/or PRC2.
Zdbf2	Rep 1	Rep 2	Rep 3
WT	0.000736908	0.00109257	0.00103526
∆CTCF_PS	0.00181925	0.00203907	0.00166547
Eed-/-	0.010463	0.00576284	0.00348336
∆CTCF_PS ; Eed-/-	0.0189739	0.0149776	0.0130391
Figure 4—figure supplement 1B: CTCF ChIP-qPCR in WT, Dnmt tKO and ∆Liz ESCs and EpiLCs at control loci.
	WT ESCs				WT EpiLCs				Dnmt tKO ESCs				Dnmt tKO EpiLCs				∆Liz ESCs				∆Liz EpiLCs
	Rep 1	Rep 2	Rep 3		Rep 1	Rep 2	Rep 3		Rep 1	Rep 2	Rep 3		Rep 1	Rep 2	Rep 3		Rep 1	Rep 2	Rep 3		Rep 1	Rep 2	Rep 3
H19	2.40967	1.82809	1.6913		1.75297	1.20504	1.46691		2.98559	3.01871	1.21881		2.70724	1.94379	1.61626		2.53323	1.11218			1.02552	2.01145	1.47164
Hoxa10	1.82181	1.37323	1.16366		1.69798	1.10566	1.03026		2.89258	2.23759	1.05052		3.6583	1.52633	1.66604		2.54535	1.02155			1.47017	1.86095	1.31623
Figure 4—figure supplement 2C: RT-qPCR of genes flanking Zdbf2 locus in WT and the ∆CTCF_PS mutant.
	WT				∆CTCF_PS
Gpr1	Rep 1	Rep 2	Rep 3		Rep 1	Rep 2	Rep 3
D0	0.000602692	0.000843609	0.000778268		0.00049865	0.000507528	0.000206193
D2	0.00805075	0.00901269	0.00432148		0.00939887	0.00776681	0.00699211
D4	0.00572325	0.00509582	0.00749339		0.00556016	0.00656947	0.006225
D7	0.0197345	0.0177778	0.00872475		0.0115464	0.0101392	0.0127557
Eef1b2	Rep 1	Rep 2	Rep 3		Rep 1	Rep 2	Rep 3
D0	1.79138	1.74372	1.85141		1.87476	2.0488	2.24035
D2	2.31649	2.41946	2.56155		1.97879	1.86571	2.46395
D4	3.37974	2.97732	2.77657		2.67458	3.52728	2.46123
D7	2.36926	2.14683	1.94143		1.76929	1.41586	1.95383
Ndufs1	Rep 1	Rep 2	Rep 3		Rep 1	Rep 2	Rep 3
D0	0.340405	0.292362	0.343251		0.347044	0.347032	0.294014
D2	0.400596	0.457887	0.35671		0.480245	0.389901	0.414028
D4	0.450292	0.394805	0.401933		0.469008	0.446312	0.493381
D7	0.424179	0.405715	0.330946		0.307573	0.319531	0.404863
Adam23	Rep 1	Rep 2	Rep 3		Rep 1	Rep 2	Rep 3
D0	0.101206	0.125645	0.123945		0.0591062	0.0565297	0.0510974
D2	0.116119	0.171433	0.180901		0.254136	0.172774	0.235579
D4	0.507466	0.422281	0.528989		0.794925	0.484846	0.6215
D7	0.0655877	0.0576592	0.115384		0.0343472	0.0470394	0.160596
Figure 4—figure supplement 2E: RT-qPCR of Liz and Zdbf2 in CTCF Degron line
Liz	Rep 1	Rep 2	Rep 3	Rep 4	Rep 5
WT	0.0170484	0.0105945	0.020687	0.0142239	0.0208362
CTCF-AID-eGFP, Tir	0.00955018	0.0113803	0.00933984
CTCF-AID-eGFP, Tir + Auxin	0.00824576	0.00762574	0.00892045
Zdbf2	Rep 1	Rep 2	Rep 3	Rep 4	Rep 5
WT	0.00030326	0.00019652	0.00187642	0.00097499	0.00056676
CTCF-AID-eGFP, Tir	0.000851491	0.00243493	0.00284395
CTCF-AID-eGFP, Tir + Auxin	0.00321519	0.00724618	0.00251994
Figure 4—figure supplement 3A: H3K27me3 ChIP-qPCR in WT and the ∆CTCF_PS mutant.
	WT ESCs				∆CTCF_PS ESCs				WT EpiLCs				∆CTCF_PS EpiLCs
	Rep 1	Rep 2	Rep 3		Rep 1	Rep 2	Rep 3		Rep 1	Rep 2	Rep 3		Rep 1	Rep 2	Rep 3
E4	0.033773	0.016978	0.028526		0.049869	0.031217	0.029716		0.020412	0.010997	0.034375		0.036996	0.039123	0.02158
sDMR_A	0.482901	0.257861	0.223668		0.310784	0.566188	0.336711		0.056085	0.026278	0.092275		0.069036	0.080849	0.077191
sDMR_B	0.763545	0.502069	0.427409		0.326246	0.548059	0.311728		0.087221	0.05892	0.09987		0.115541	0.095944	0.113625
sDMR_C	0.723953	0.555485	0.429701		0.385834	0.644215	0.588922		0.053173	0.023046	0.110731		0.111643	0.10387	0.151553
pZdbf2	0.170501	0.099767	0.08962		0.194021	0.211557	0.158259		0.029848	0.005465	0.047911		0.06845	0.052767	0.034787
Pax5	1.41452	0.783338	0.756807		0.663766	0.995763	0.775753		6.71982	5.34499	3.69941		4.0806	2.61623	4.31906
Oct4	0.002303	0.003455	0.003676		0.004992	0.00301	0.003135		0.020994	0.007666	0.047052		0.014136	0.026439	0.017748
BActin	0.01067	0.006117	0.003201		0.008363	0.019611	0.005284		0.014133	0.002089	0.030751		0.016387	0.032836	0.017438
Figure 4—figure supplement 3E: RT-qPCR of Zdbf2 in absence of CTCF partition with EZH2 inhibitor
Zdbf2	Rep 1	Rep 2	Rep 3
WT (Negative Ctrl)	0.000814012	0.000588017	0.000589231
∆CTCF_PS (Negative Ctrl)	0.00112078	0.000804462	0.00129272
WT (EZH2 Inhibitor)	0.00088371	0.00058543706952061*	0.00155918
∆CTCF_PS (EZH2 Inhibitor)	0.00209994	0.00224056	0.00183568
