# Supplementary figures and images for: Dynamic enhancer partitioning instructs activation of a growth-related gene during exit from naïve pluripotency
Source: eLife journal article supplement (doi:10.7554/elife.44057), 2019-04-16

Figure 1 —figure supplement 1

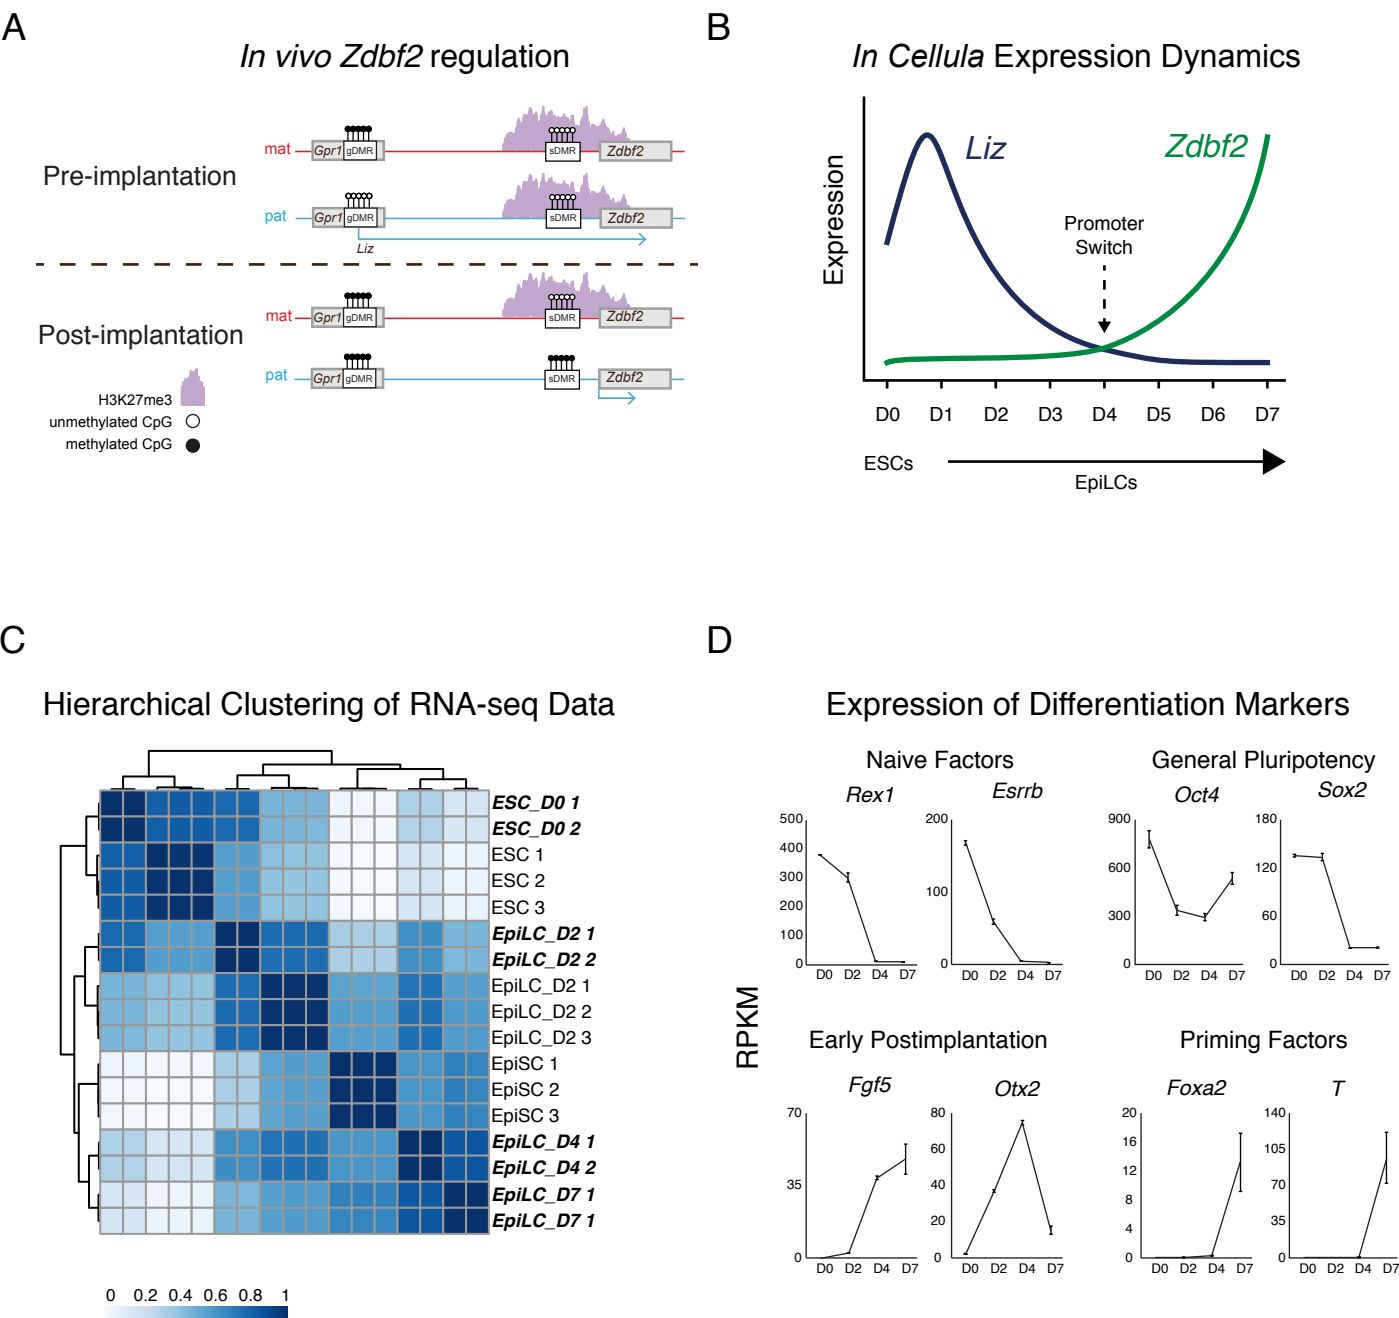

Supplement: supp [file elife_poa_e44057_Figure_1_figure_supplement_1.pdf › elife_poa_e44057_Figure_1_figure_supplement_1.pdf]

Figure 1 —figure supplement 2

A

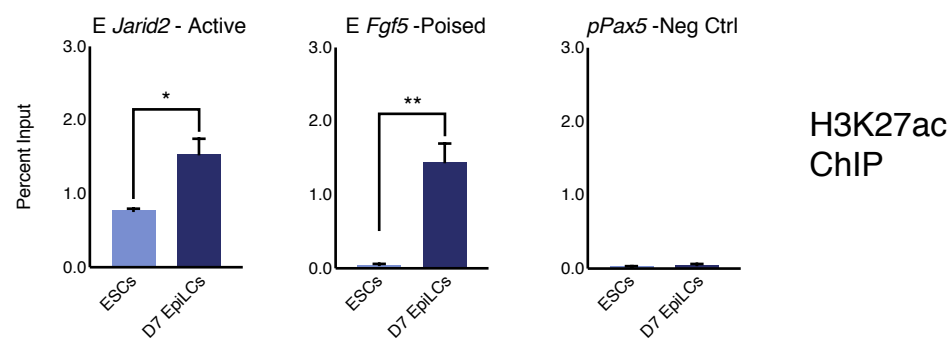

B

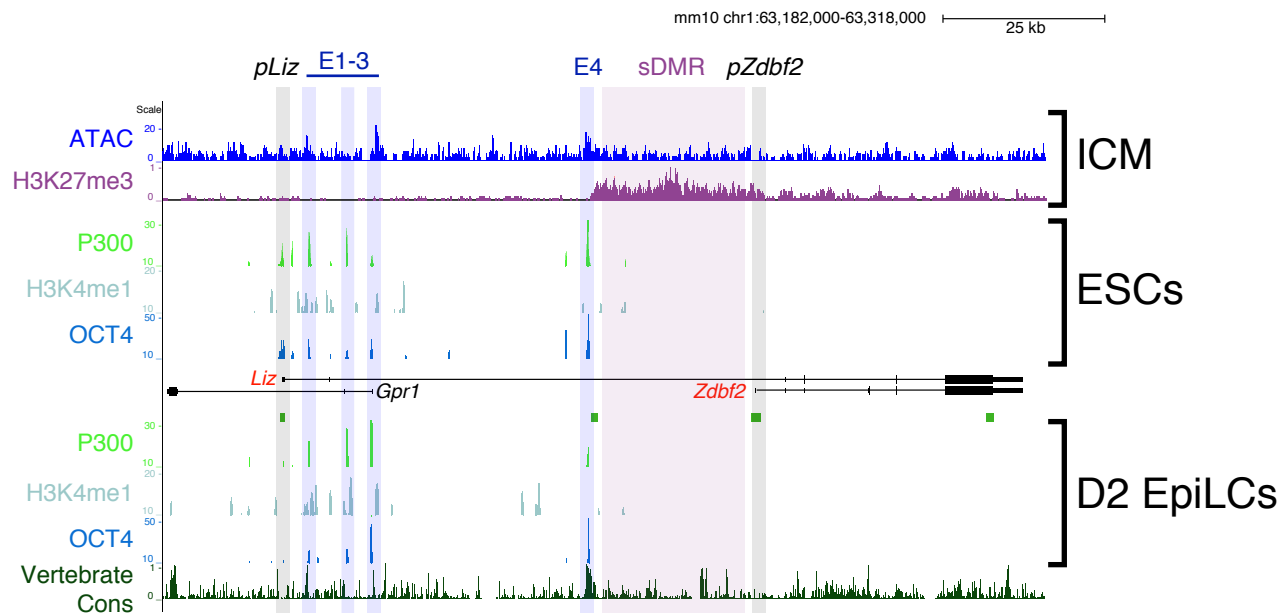

Supplement: supp [file elife_poa_e44057_Figure_1_figure_supplement_2.pdf › elife_poa_e44057_Figure_1_figure_supplement_2.pdf]

Figure 1 —figure supplement 3

A

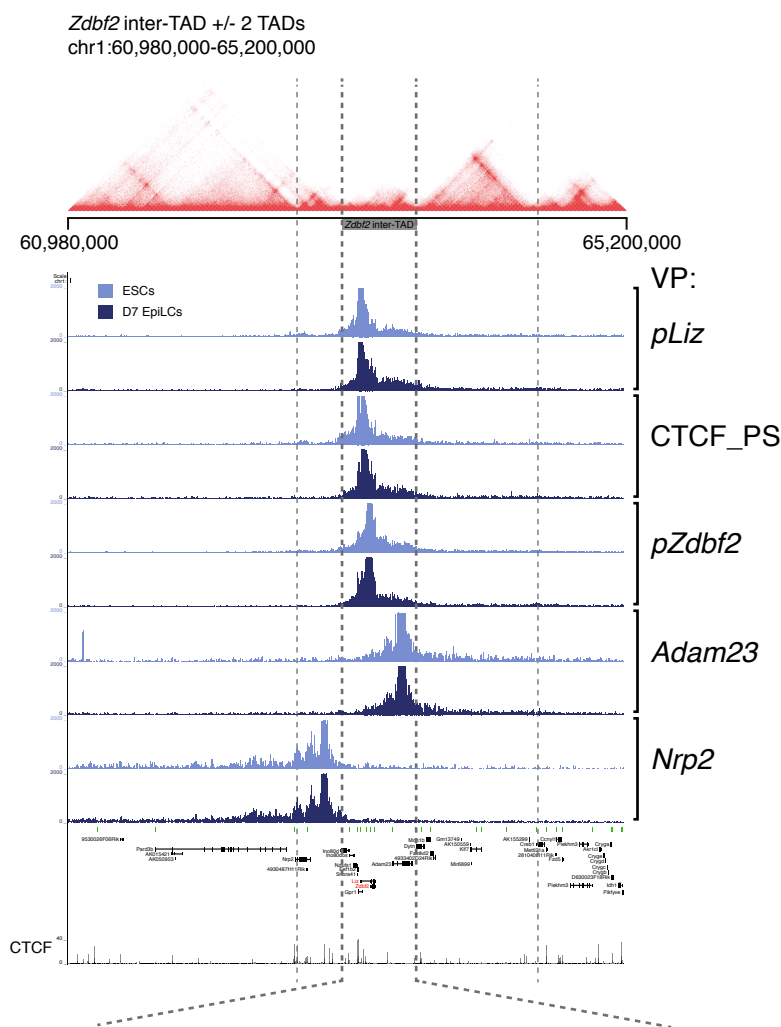

B

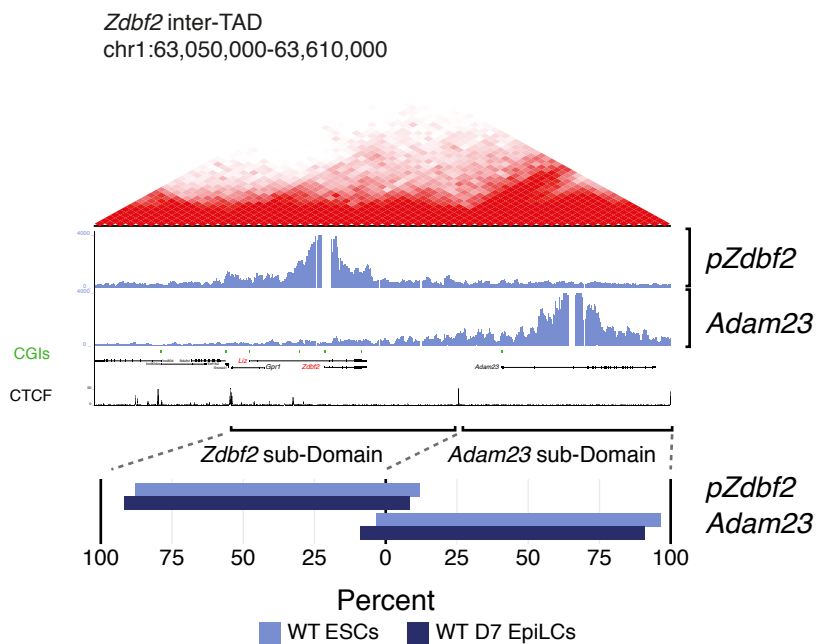

Supplement: supp [file elife_poa_e44057_Figure_1_figure_supplement_3.pdf › elife_poa_e44057_Figure_1_figure_supplement_3.pdf]

Figure 2—figure supplement 1

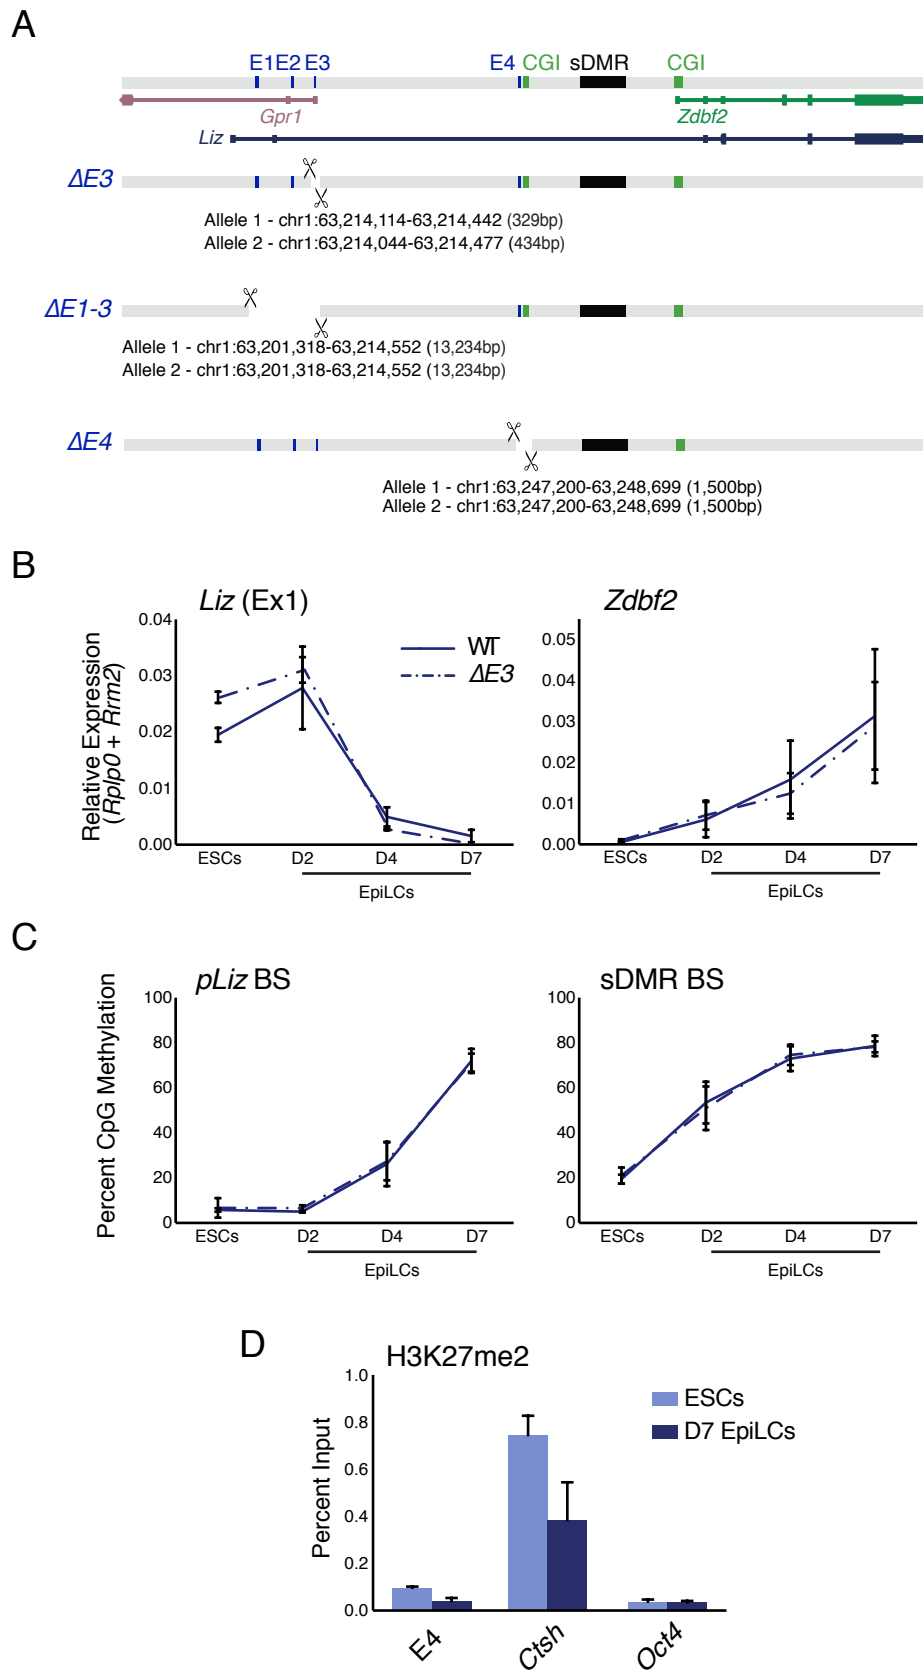

Supplement: supp [file elife_poa_e44057_Figure_2_figure_supplement_1.pdf › elife_poa_e44057_Figure_2_figure_supplement_1.pdf]

Figure 3—figure supplement 1

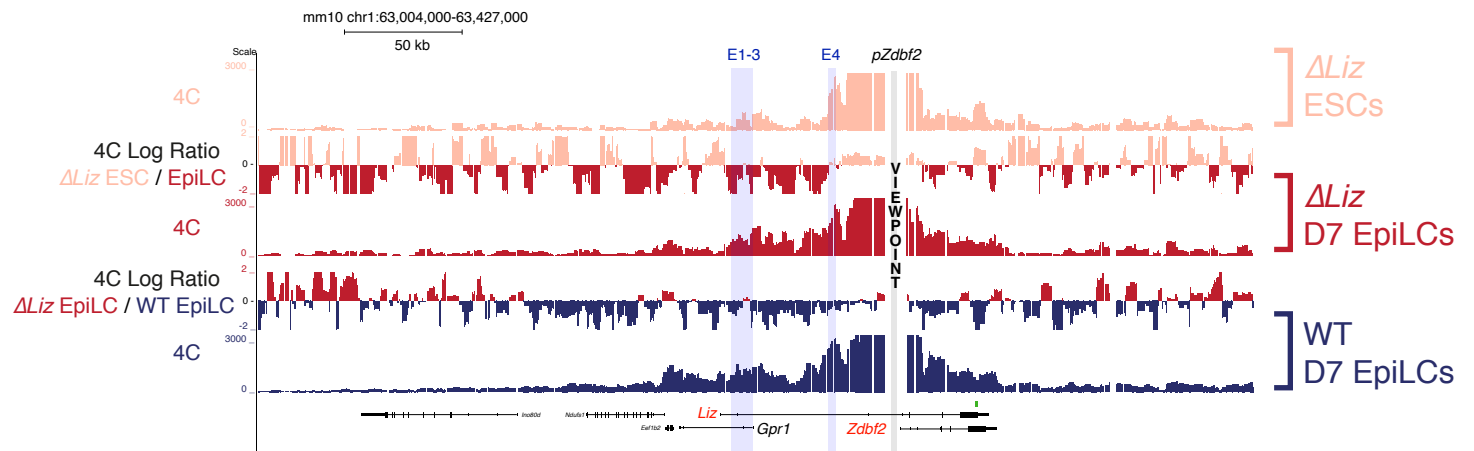

Supplement: supp [file elife_poa_e44057_Figure_3_figure_supplement_1.pdf › elife_poa_e44057_Figure_3_figure_supplement_1.pdf]

Figure 4—figure supplement 1

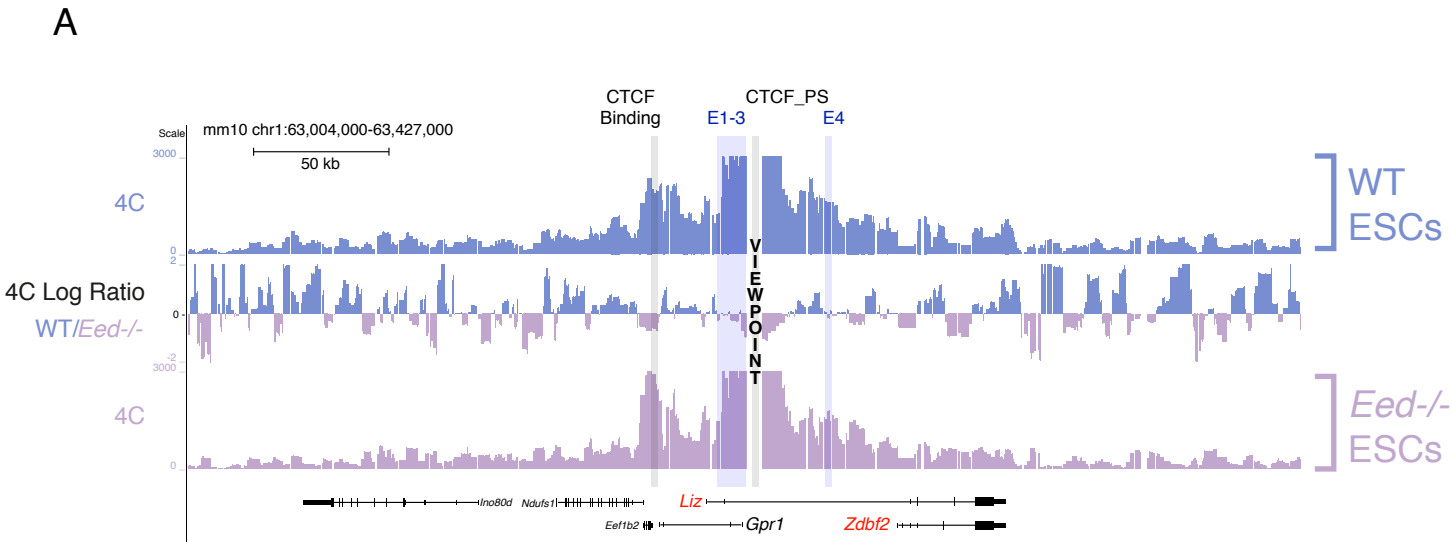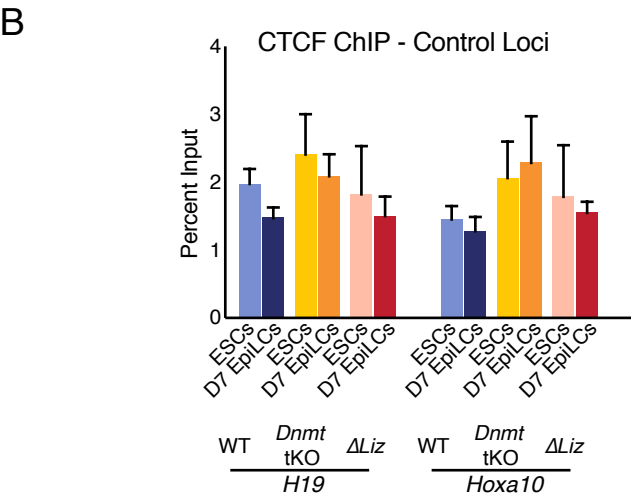

Supplement: supp [file elife_poa_e44057_Figure_4_figure_supplement_1.pdf › elife_poa_e44057_Figure_4_figure_supplement_1.pdf]

## Figure 4—figure supplement 2

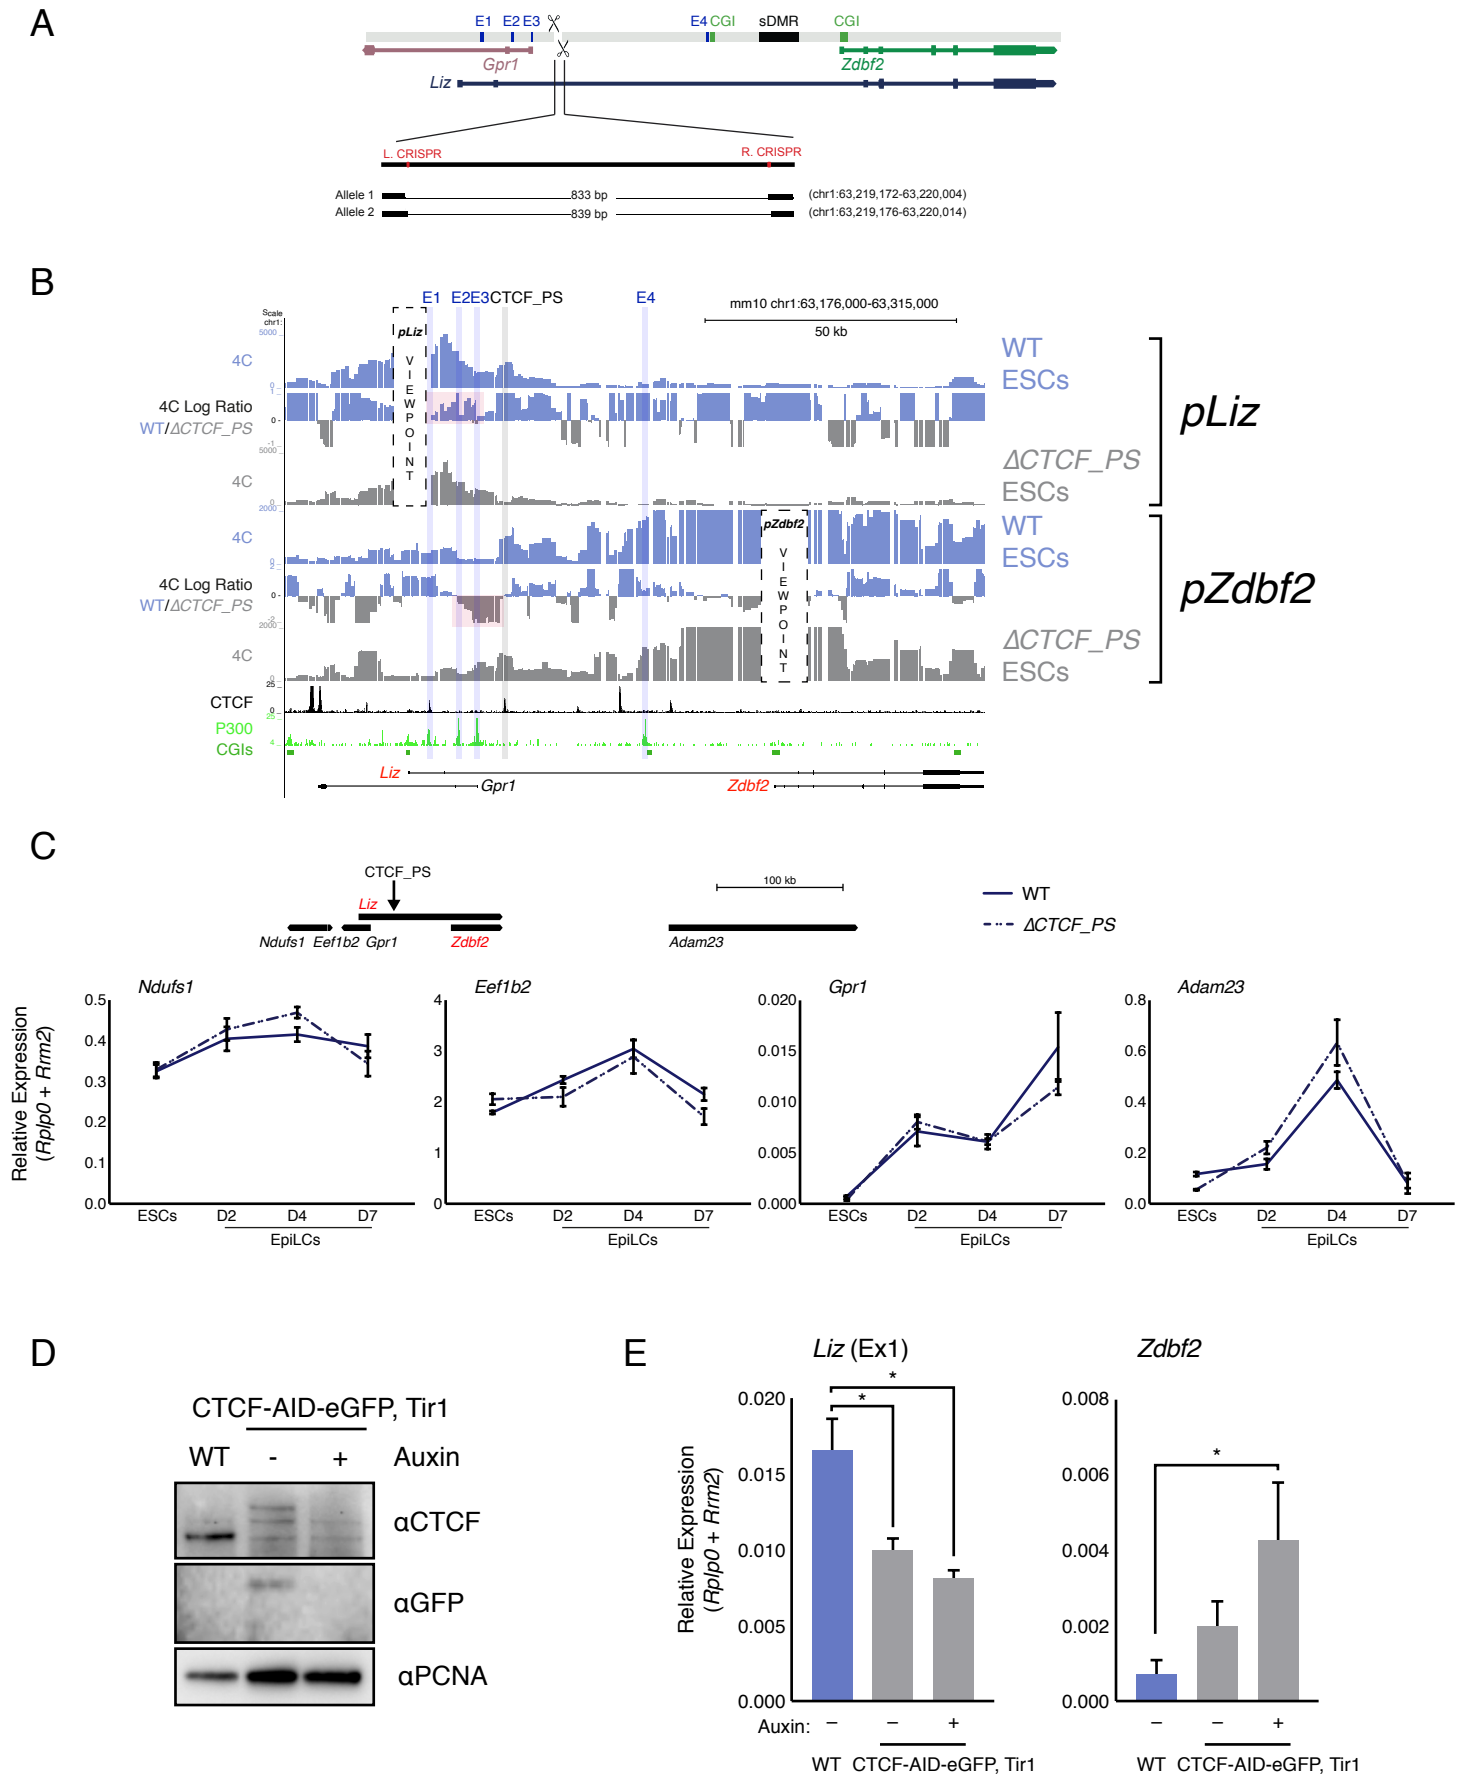

Supplement: supp [file elife_poa_e44057_Figure_4_figure_supplement_2.pdf › elife_poa_e44057_Figure_4_figure_supplement_2.pdf]

Figure 4—figure supplement 3

A

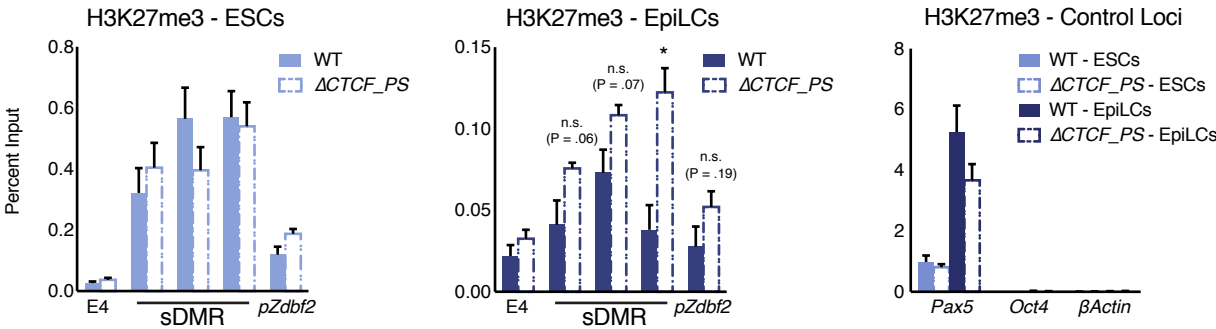

B

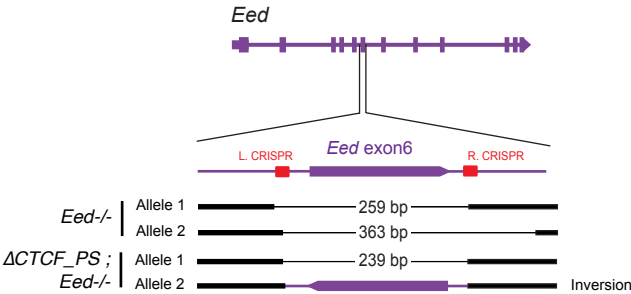

C

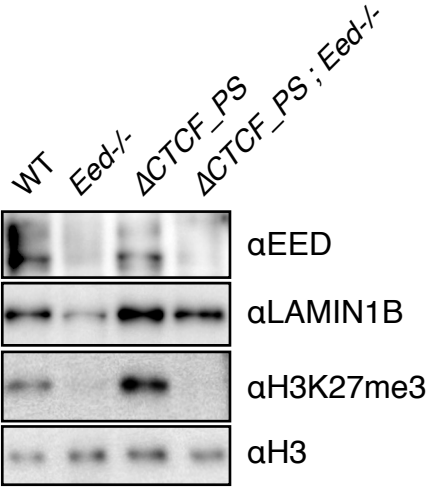

D

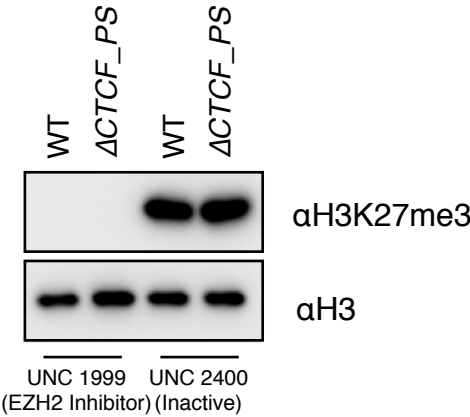

E

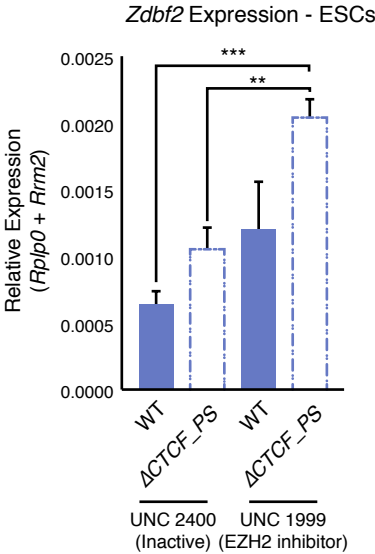

Supplement: supp [file elife_poa_e44057_Figure_4_figure_supplement_3.pdf › elife_poa_e44057_Figure_4_figure_supplement_3.pdf]
